# Supplementary material
Source: PubMed Central journal article supplement (PMC6422087)
Supplement: supp_RA118.007207_142654_1_supp_268309_plctn6.pdf [file supp_RA118.007207_142654_1_supp_268309_plctn6.pdf]

# Structural and functional characterization of a bifunctional GH30-7 xylanase B from the filamentous fungus *Talaromyces cellulolyticus*

Yusuke Nakamichi<sup>1</sup>, Thierry Fouquet<sup>2</sup>, Shotaro Ito<sup>3</sup>, Masahiro Watanabe<sup>1</sup>, Akinori Matsushika<sup>1,4</sup>, and Hiroyuki Inoue<sup>1</sup>

From the <sup>1</sup>Bioconversion Group & the <sup>3</sup>Bio-based Materials Chemistry Group, Research Institute for Sustainable Chemistry, National Institute of Advanced Industrial Science and Technology (AIST), 3-11-32 Kagamiyama, Higashi-Hiroshima, Hiroshima 739-0046, Japan. <sup>2</sup>Polymer Chemistry Group, Research Institute for Sustainable Chemistry, AIST, 1-1-1 Higashi, Tsukuba, Ibaraki 305-8565, Japan. <sup>4</sup>Graduate School of Advanced Sciences of Matter, Hiroshima University, 1-3-1 Kagamiyama, Higashi-Hiroshima, Hiroshima 739-8530, Japan.

## Supplementary Information

| Contents                                                                                                                | Page |
|-------------------------------------------------------------------------------------------------------------------------|------|
| Figure S1. 2D gel electrophoresis analysis (pH4-5) of <i>T. cellulolyticus</i> CF-2612 culture grown on birchwood xylan | S-2  |
| Figure S2. Characterization of purified Xyn30B                                                                          | S-3  |
| Figure S3. <i>N</i> -linked carbohydrate moieties and structures in Xyn30B assigned by electron density map             | S-4  |
| Figure S4. <i>Fo-Fc</i> omit map for <i>N</i> -linked carbohydrate moieties                                             | S-5  |
| Figure S5. Structural differences in the $\beta$ 2- $\alpha$ 2 loops of Xyn30B and <i>EcXynA</i>                        | S-6  |
| Figure S6. Amino acid sequence alignment of GH30-7 enzymes                                                              | S-7  |
| Table S1. Xylooligosaccharides generated by Xyn30B reaction                                                             | S-9  |

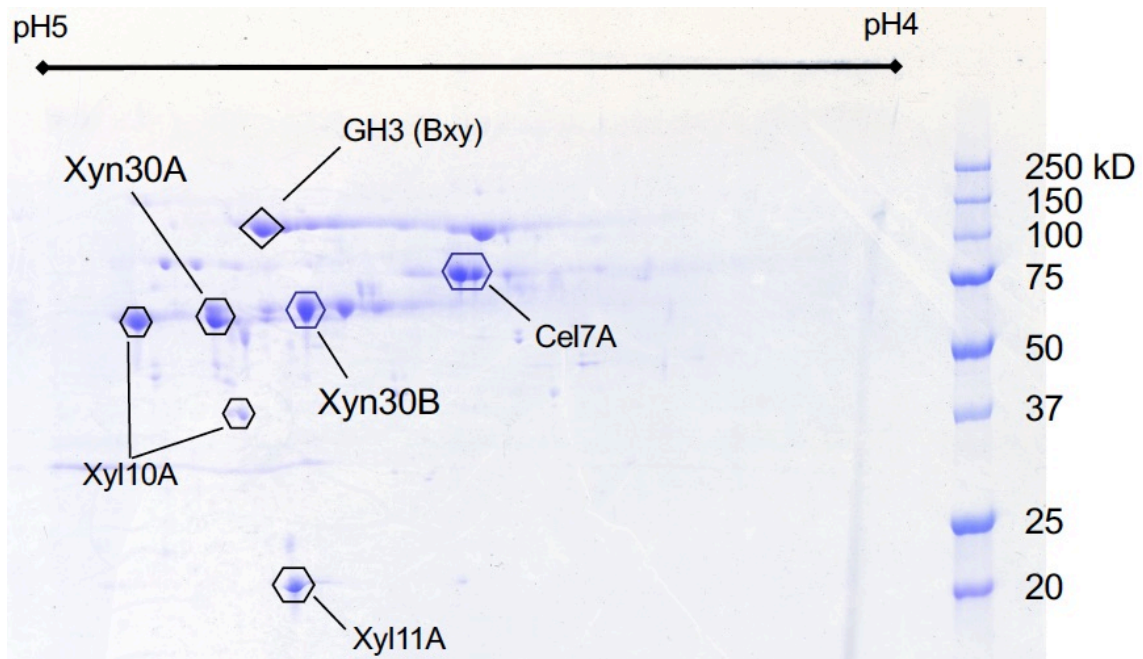

**Figure S1. 2D gel electrophoresis analysis (pH4-5) of *T. cellulolyticus* CF-2612 culture grown on birchwood xylan.**

CF-2612 was grown on a medium (pH 4.0) containing, per liter: 50 g birchwood xylan, 24 g  $\text{KH}_2\text{PO}_4$ , 1 g Tween 80, 5 g  $(\text{NH}_4)_2\text{SO}_4$ , 1.2 g  $\text{MgSO}_4 \cdot 7\text{H}_2\text{O}$ , 0.01 g  $\text{ZnSO}_4 \cdot 7\text{H}_2\text{O}$ , 0.01 g  $\text{MnSO}_4 \cdot 6\text{H}_2\text{O}$ , 0.01 g  $\text{CuSO}_4 \cdot 7\text{H}_2\text{O}$ , and 4.0 g urea, at 30 °C, 200 rpm, for 72 h in an Erlenmeyer flask. The major protein spots on the gel were treated by endoproteinase Lys-C and analyzed by HPLC peptide mapping. Proteins from the resulting peptide sequences were assigned using a draft genome sequence of *T. cellulolyticus* Y-94. Xyn30B was identified from two peptide sequences (SAEDYLS, FYAESGVPVTHL), and Xyn30A was from two peptide sequences (ATVPPRAVQVF and DFLEIL). Bxy, GH3  $\beta$ -xylosidase; Cel7A, GH7 cellobiohydrolase I; Xyl10A, GH10 xylanase A; Xyl11A, GH11 xylanase A.

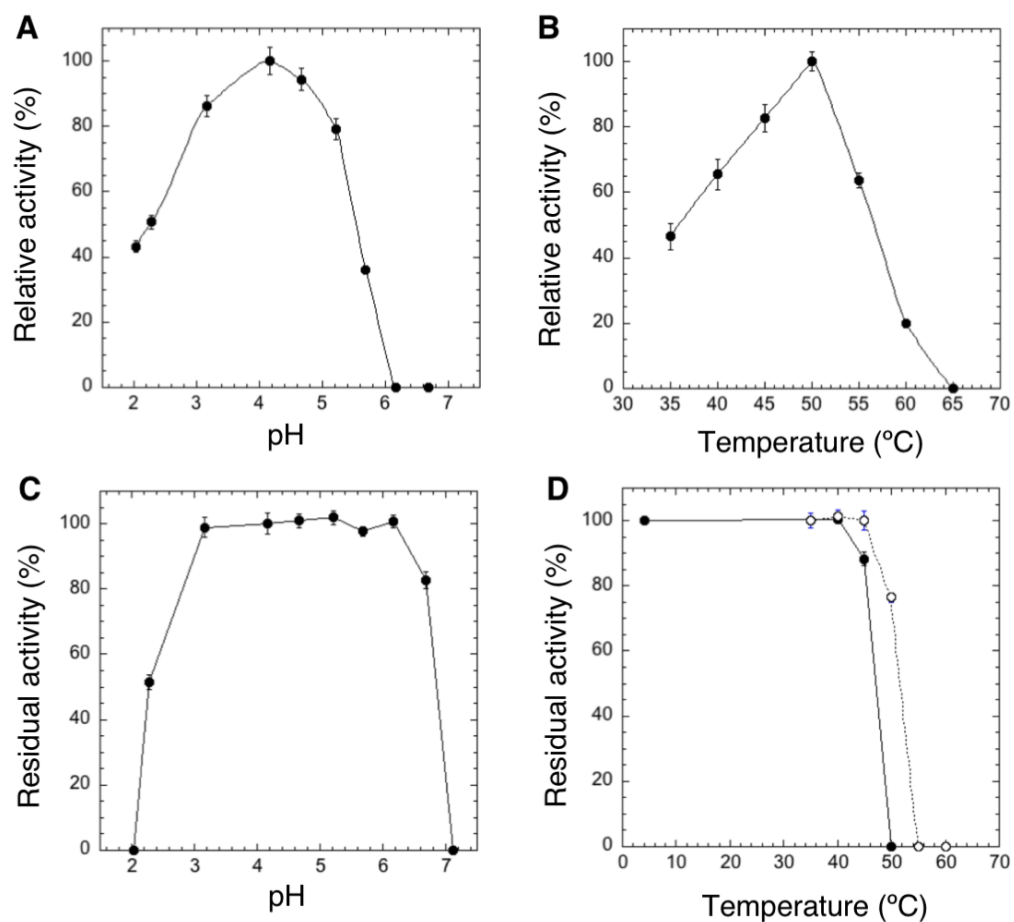

**Figure S2. Characterization of purified Xyn30B.**

Xylanase activity was measured in a reaction mixture containing purified Xyn30B and 10 mg mL<sup>-1</sup> beechwood xylan. (A) Optimal pH. Maximum activity is relatively taken as 100%. The reaction mixture was incubated at 40°C for 15 min in a pH range of 2.0–6.5. (B) Optimal temperature. Maximum activity is relatively taken as 100%. The reaction mixture was incubated at 35–60°C for 15 min in 50 mM sodium acetate (pH 4.0). (C) pH stability. The enzyme was preincubated in a pH range of 2.0–7.0 at 40°C for 30 min, and the residual activity was subsequently measured at 40°C for 15 min in 50 mM sodium acetate (pH 4.0). (D) Thermal stability. The enzyme was preincubated in 50 mM sodium acetate (pH 4.0) at 4–60°C for 30 min (open circle) or 24 hours (filled circle), and residual activity was measured at 40°C for 15 min.

**Chain A**

|        |                                                                                                                                                                           |
|--------|---------------------------------------------------------------------------------------------------------------------------------------------------------------------------|
| Asn60  | Man $\beta$ 1 — 4GlcNAc $\beta$ 1 — 4GlcNAc $\beta$                                                                                                                       |
| Asn88  | $\begin{array}{c} \text{Man } \alpha 1 \searrow 3 \\ \text{Man } \alpha 1 \swarrow 6 \end{array} \text{Man } \beta 1 \text{ — 4GlcNAc } \beta 1 \text{ — 4GlcNAc } \beta$ |
| Asn215 | GlcNAc $\beta$                                                                                                                                                            |
| Asn334 | Man $\beta$ 1 — 4GlcNAc $\beta$ 1 — 4GlcNAc $\beta$                                                                                                                       |
| Asn346 | GlcNAc $\beta$ 1                                                                                                                                                          |
| Asn412 | GlcNAc $\beta$ 1 — 4GlcNAc $\beta$                                                                                                                                        |

**Chain B**

|        |                                                                                                                                                                           |
|--------|---------------------------------------------------------------------------------------------------------------------------------------------------------------------------|
| Asn60  | Man $\alpha$ 1 — 6Man $\beta$ 1 — 4GlcNAc $\beta$ 1 — 4GlcNAc $\beta$                                                                                                     |
| Asn88  | $\begin{array}{c} \text{Man } \alpha 1 \searrow 3 \\ \text{Man } \alpha 1 \swarrow 6 \end{array} \text{Man } \beta 1 \text{ — 4GlcNAc } \beta 1 \text{ — 4GlcNAc } \beta$ |
| Asn215 | GlcNAc $\beta$                                                                                                                                                            |
| Asn334 | Man $\beta$ 1 — 4GlcNAc $\beta$ 1 — 4GlcNAc $\beta$                                                                                                                       |
| Asn346 | GlcNAc $\beta$ 1 — 4GlcNAc $\beta$                                                                                                                                        |
| Asn412 | GlcNAc $\beta$ 1 — 4GlcNAc $\beta$                                                                                                                                        |

**Figure S3. N-linked carbohydrate moieties and structures in Xyn30B assigned by electron density map shown in Fig. S4.**

Two molecules of Xyn30B in an asymmetric unit in the crystal are named as chain A and B.

### Chain A

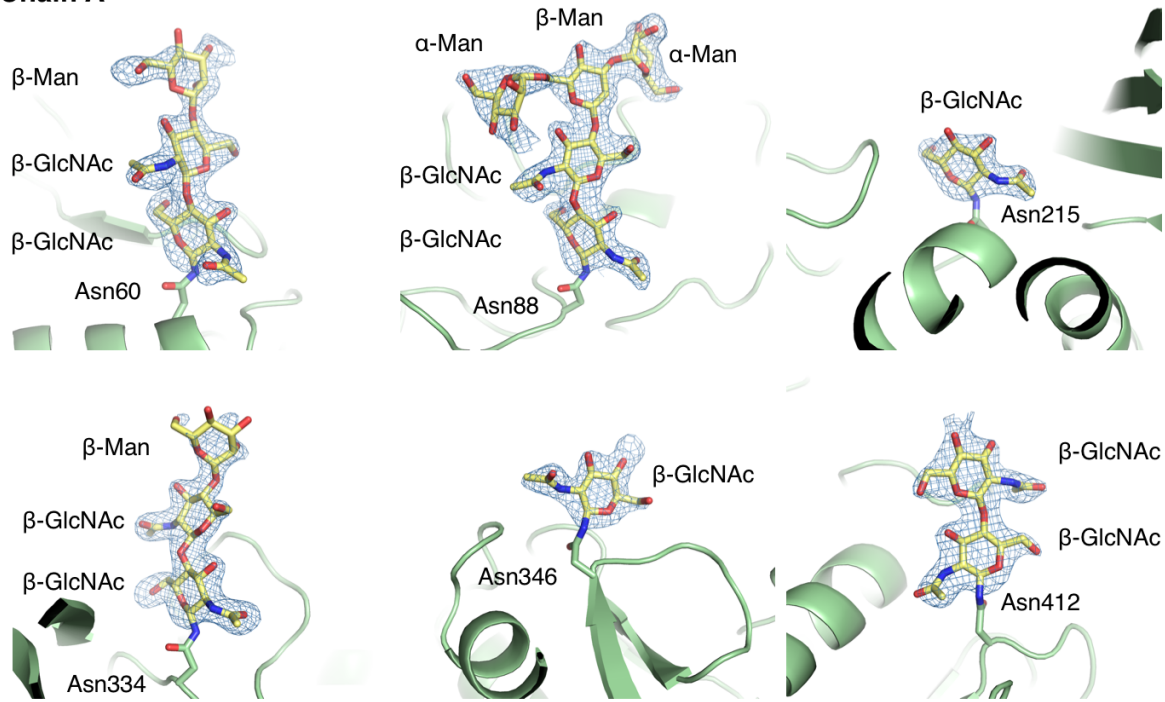

### Chain B

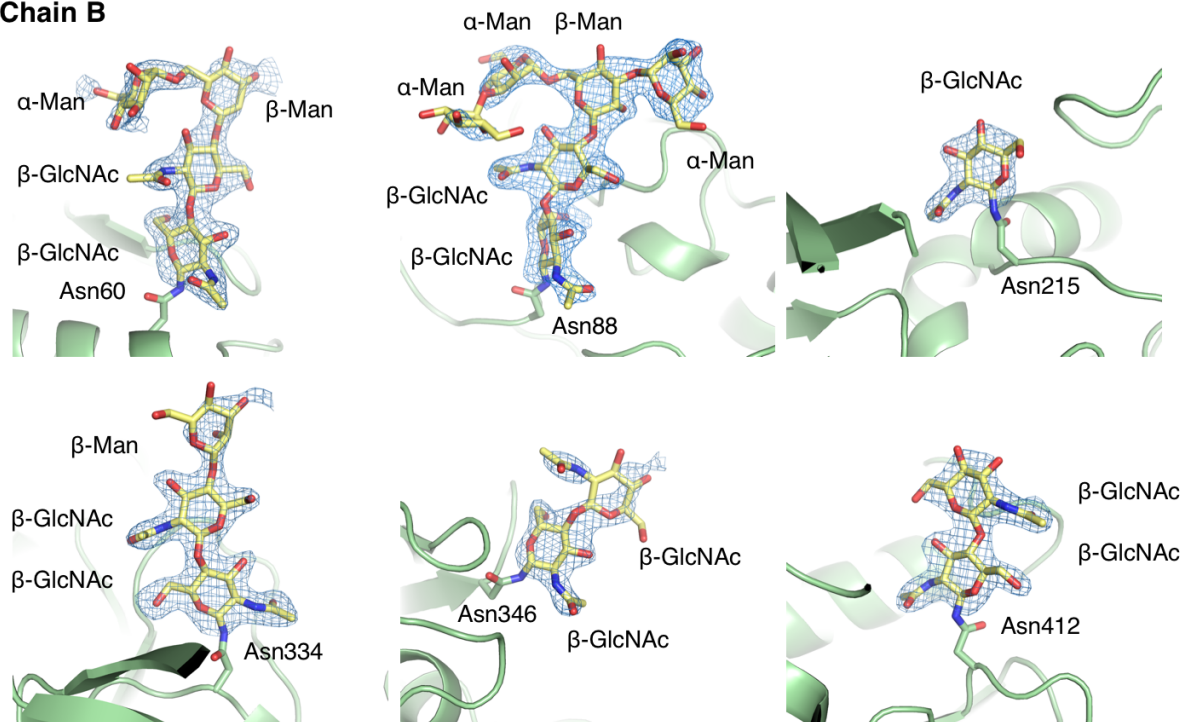

**Figure S4.** *F<sub>o</sub>-F<sub>c</sub>* omit map (blue) for *N*-linked carbohydrate moieties, which is calculated without sugar residues, is contoured at 3.0  $\sigma$ .

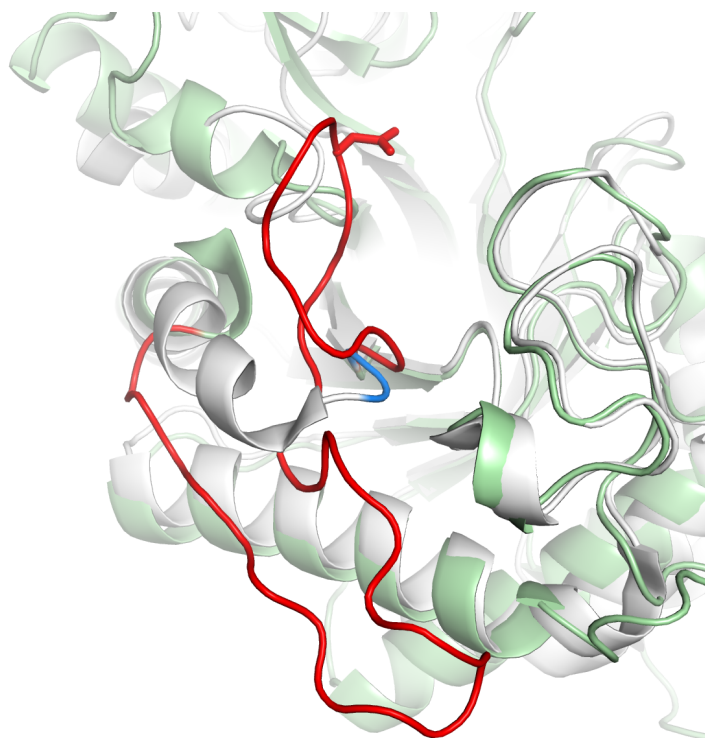

**Figure S5. Structural differences in the  $\beta 2$ - $\alpha 2$  loops of Xyn30B and *EcXynA*.**

The  $\beta 2$ - $\alpha 2$  loops of Xyn30B and *EcXynA* are shown by red and blue, respectively. Asn-93 of Xyn30B is shown as a stick. Atoms are colored as follows: green, C of Xyn30B; white, C of *EcXyn30A*.

|                                      | 29 |   | 46 | 51 |   |   |   |   |   |   |   |   |   |   |   |   |   |   |   |   |   |   |   |
|--------------------------------------|----|---|----|----|---|---|---|---|---|---|---|---|---|---|---|---|---|---|---|---|---|---|---|
| Xyn30B                               | Q  | A | R  | Y  | Q | S | V | D | G | F | G | C | S | Q | A | F | Q | R | A | E | D | I | F |
| <i>T.reesei</i> XYN VI               | G  | S | K  | F  | Q | Q | I | D | G | F | G | F | S | Q | A | F | G | R | A | R | E | F | Q |
| Xyn30A                               | L  | Q | R  | Y  | Q | E | M | I | G | G | G | C | S | G | A | F | G | W | A | C | Q | Q | F |
| <i>F.fujikuroi</i> CCT73001          | N  | K | K  | L  | Q | V | I | D | G | F | G | V | S | E | A | Y | G | H | A | K | Q | F | Q |
| <i>T.reesei</i> XYN IV               | R  | Q | T  | Y  | Q | T | M | I | G | G | G | C | S | G | A | F | G | I | A | C | Q | Q | F |
| <i>T.terrestris</i> THITE 2123443    | G  | V | R  | Y  | Q | T | M | M | G | G | G | C | S | G | A | F | G | V | A | C | D | Q | T |
| <i>A.oligospora</i> EGX45083         | G  | T | T  | Y  | Q | T | I | E | G | F | G | F | S | Q | A | F | G | R | A | V | E | F | K |
| Bispore sp. XYLD                     | N  | E | E  | K  | Q | I | V | D | G | F | G | F | S | E | A | F | G | R | A | E | N | V | F |
| <i>F.fujikuroi</i> CCT73045          | H  | V | R  | Y  | Q | E | L | D | G | F | G | A | S | Q | A | F | Q | R | A | E | D | I | L |
| <i>L.maculans</i> CBX92400           | V  | K | T  | Y  | Q | T | M | D | G | F | G | M | S | E | T | F | Q | R | A | N | Q | M | K |
| <i>L.maculans</i> CBX93583           | T  | K | G  | Y  | Q | T | I | D | G | F | G | V | S | A | A | F | Q | R | A | N | L | I | V |
| <i>L.maculans</i> xyl38              | V  | K | T  | Y  | Q | T | M | D | G | F | G | M | S | E | T | F | Q | R | A | N | Q | M | K |
| <i>P.comata</i> VBB81111             | S  | R | T  | F  | Q | T | M | D | G | F | G | A | S | E | A | F | Q | R | A | V | T | M | K |
| <i>P.comata</i> VBB86450             | T  | R | T  | F  | Q | K | M | D | G | F | G | F | S | L | A | F | Q | R | A | N | L | I | T |
| <i>S.lignohabitans</i>               | A  | Q | T  | Y  | Q | E | I | D | G | F | G | F | S | E | A | F | Q | R | A | N | D | L | Y |
| <i>T.purpureogenus</i> AKH40280      | K  | V | Q  | F  | Q | E | V | D | G | F | G | A | S | Q | A | F | Q | R | A | E | D | I | F |
| <i>T.terrestris</i> THITE 30409      | G  | T | K  | Y  | Q | R | I | D | G | F | G | F | S | Q | A | F | G | R | A | A | E | F | Q |
| <i>T.thermophila</i> AE055025        | S  | T | T  | Y  | Q | R | I | D | G | F | G | T | S | E | A | F | Q | R | A | V | Q | M | S |
| <i>T.thermophila</i> AE057693        | S  | Q | T  | Y  | Q | R | M | D | G | F | G | F | S | L | A | F | Q | R | A | N | L | I | T |
| <i>A.albispora</i> AXB42337          | A  | R | R  | H  | Q | P | I | D | G | F | G | F | S | E | A | F | G | R | A | E | I | M | R |
| <i>A.derwentensis</i> SDT08346       | -  | M | S  | C  | S | P | I | D | G | F | G | F | S | E | H | F | G | R | A | T | I | M | H |
| <i>A.orientalis</i> CAA11771         | R  | H | S  | L  | Q | P | I | D | G | F | G | F | S | Q | A | F | Q | R | A | A | R | I | R |
| <i>N.gerenzanensis</i> SB093718      | R  | V | R  | H  | Q | E | I | D | G | F | G | I | S | Q | A | F | R | R | N | E | L | L | E |
| <i>N.gerenzanensis</i> SB096059      | G  | V | R  | H  | Q | T | I | D | G | F | G | I | S | T | A | F | R | R | G | E | L | L | K |
| <i>Nonomuraea</i> sp. AQZ61832       | S  | Q | T  | H  | Q | T | I | D | G | F | G | Y | S | T | A | F | Q | R | A | T | L | V | H |
| <i>Nonomuraea</i> sp. AQZ61834       | Q  | V | R  | H  | Q | E | I | D | G | F | G | I | S | T | A | F | R | R | N | E | L | L | K |
| <i>Nonomuraea</i> sp. AQZ65470       | R  | V | R  | H  | Q | E | I | D | G | F | G | I | S | Q | A | F | R | R | N | E | L | L | K |
| <i>Plantactinospora</i> sp. ASW57759 | A  | Q | T  | H  | Q | P | I | D | G | F | G | Y | S | I | A | F | Q | R | A | S | L | V | H |
| <i>S.bingchengensis</i> ADI10522     | G  | Q | R  | Q  | Q | P | I | D | G | F | G | F | S | Q | A | F | Q | R | A | D | I | M | H |
| <i>S.hygroscopicus</i> AQW50539      | G  | Q | H  | L  | Q | P | I | D | G | F | G | F | S | Q | A | F | Q | R | A | D | V | M | H |
| <i>S.iranensis</i> CDR10147          | G  | R | R  | L  | Q | P | I | D | G | F | G | F | S | Q | A | F | Q | R | A | D | L | M | H |
| <i>S.lincolnensis</i> ANS64779       | S  | T | T  | H  | Q | P | I | D | G | F | G | F | S | E | H | F | G | R | A | D | I | M | R |
| <i>S.lincolnensis</i> AXG57013       | S  | T | T  | H  | Q | P | I | D | G | F | G | F | S | E | H | F | G | R | A | D | I | M | R |
| <i>S.rapamycinicus</i> AGP58059      | G  | R | H  | L  | Q | P | I | D | G | F | G | F | S | Q | A | F | Q | R | A | D | L | M | H |
| <i>S.venezuelae</i> ALO06247         | R  | A | A  | L  | Q | P | I | D | G | F | G | F | S | M | A | F | Q | R | A | D | L | L | H |
| <i>S.venezuelae</i> CCA60025         | R  | A | E  | L  | Q | P | I | D | G | F | G | F | S | M | A | F | Q | R | A | D | L | L | H |
| <i>S.venezuelae</i> CUM43504         | R  | A | A  | L  | Q | P | I | D | G | F | G | F | S | M | A | F | Q | R | A | D | L | L | H |
| <i>S.vietnamensis</i> AJF69043       | R  | A | D  | L  | Q | P | I | D | G | F | G | F | S | M | A | F | Q | R | A | D | L | L | H |
| <i>Streptomyces</i> sp. ASQ94399     | G  | Q | H  | L  | Q | P | I | D | G | F | G | F | S | Q | A | F | Q | R | A | D | V | M | H |
| <i>Streptomyces</i> sp. AXE85427     | S  | T | R  | H  | Q | P | I | D | G | F | G | I | S | E | H | F | G | R | A | E | I | M | R |
| <i>A.derwentensis</i> SDT07978       | T  | T | R  | Y  | Q | R | I | D | G | F | G | I | S | E | A | F | G | T | A | N | Q | L | R |
| BsXynC                               | S  | A | E  | K  | Q | V | I | R | G | F | G | G | M | N | H | P | A | W | A | G | D | L | T |
| EcXynA                               | N  | V | N  | Y  | Q | I | I | Q | G | F | G | G | M | S | G | V | G | W | I | N | D | L | T |

**Figure S6. Amino acid sequence alignment of GH30-7 enzymes.**

Amino acid sequence alignment of the region around Arg46 of Xyn30B was conducted using program MEGA7 (1). Amino acid sequences used for the alignment were from the following fungal GH30-7 enzymes: *T. cellulolyticus* Xyn30B (NCBI protein ID: GAM36763), *T.reesei* XYN VI (EGR45006), *T. cellulolyticus* Xyn30A (GAM43270), *T. reesei* XYN IV (AAP64786), *Arthrobotrys oligospora* ATCC24927 AOL\_s00173g184

(EGX45083), *Bispora* sp. MEY-1 XylD (ADG62369), *Fusarium fujikuroi* IMI58289 FFUJ\_12899 (CCT73001), *F. fujikuroi* IMI58289 FFUJ\_12945 (CCT73045), *Leptosphaeria maculans* Xyl38 (AAO49459), *L. maculans* JN3 LEMA\_P044840.1 (CBX93583), *L. maculans* JN3 LEMA\_P051060.1 (CBX92400), *Podospora comate* PODCO\_503770 (VBB81111), *P. comate* PODCO\_702000 (VBB86450), *Sugiyamaella lignohabitans* AWJ20\_568 (ANB12318), *Talaromyces purpureogenus* XynC (AKH40280), *Thermothelomyces thermophila* ATCC42464 Gxhl (AEO55025), *T. thermophila* ATCC42464 THITE\_30409 (AEO57693) and bacterial GH30-7 enzymes: *Actinoplanes derwentensis* DSM43941 SAMN04489716\_2447 (SDT07978), *A. derwentensis* DSM43941 SAMN04489716\_2458 (SDT08346), *Amycolatopsis albispota* WP1 A4R43\_07175 (AXB42337), *Amycolatopsis orientalis* PCZA361.14 (CAA11771), *Nonomuraea gerenzanensis* ATCC39727 BN4615\_P5575 (SBO96059), *N. gerenzanensis* ATCC39727 BN4615\_P3232 (SBO93718), *Nonomuraea* sp. ATCC55076 BKM31\_32010 (AQZ65470), *Nonomuraea* sp. ATCC55076 BKM31\_10440 (AQZ61834), *Nonomuraea* sp. ATCC55076 BKM31\_10430 (AQZ61832), *Plantactinospora* sp. KBS50 CIK06\_16110 (ASW57759), *Streptomyces bingchenggensis* BCW-1 SBI\_07402 (ADI10522), *Streptomyces hygrosopicus* XM201 SHXM\_04002 (AQW50539), *Streptomyces iranensis* SIRAN6727 (CDR10147), *Streptomyces lincolnensis* LC-G SLCG\_5858 (AXG57013), *S. lincolnensis* NRRL2936 SLINC\_2555 (ANS64779), *Streptomyces rapamycinicus* NRRL5491 M271\_33220 (AGP58059), *Streptomyces* sp. 11-1-2 CGL27\_16155 (ASQ94399), *Streptomyces* sp. Go-475 XynC (AXE85427), *Streptomyces venezuelae* ATCC10712 SVEN\_6739 (CCA60025), *S. venezuelae* ATCC15439 BN2537\_15973 (CUM43504), *S. venezuelae* ATCC15439 AQF52\_0650 (ALO06247), *Streptomyces vietnamensis* GIM4.0001 SVTN\_36865 (AJF69043) and bacterial GH30-8 enzymes: *Bacillus subtilis* subsp. *subtilis* str. 168 *Bs*XynC (CAA97612) and *Dickeya chrysanthemi* D1 *Ec*XynA (AAB53151). The amino acid numbering is according to the Xyn30B sequence. The Arg residues and the other residues corresponding to Arg-46 of Xyn30B are highlighted by green and blue, respectively. Highly conserved residues are highlighted by yellow.

## References

1. Kumar, S., Stecher, G., and Tamura, K. (2016) MEGA7: molecular evolutionary genetics analysis version 7.0. *molecular biology and evolution. Mol. Biol. Evol.* **33**, 1870–1874



**Table S1. Xylooligosaccharides generated by Xyn30B reaction**

| Reaction time (h) | Products (mM) |                  |                  |                  |                  |                  |
|-------------------|---------------|------------------|------------------|------------------|------------------|------------------|
|                   | Xyl           | Xyl <sub>2</sub> | Xyl <sub>3</sub> | Xyl <sub>4</sub> | Xyl <sub>5</sub> | Xyl <sub>6</sub> |
| 1                 | ND            | 0.35             | 0.013            | 0.031            | ND               | 0.025            |
| 6                 | 0.0079        | 1.1              | 0.033            | 0.22             | 0.018            | 0.075            |
| 12                | 0.02          | 1.6              | 0.061            | 0.37             | 0.034            | 0.13             |

ND, not detected

**Table S1.** The release of linear xylooligosaccharides from 10 mg mL<sup>-1</sup> beechwood xylan was performed using 100 µg mL<sup>-1</sup> Xyn30B in 50 mM sodium acetate pH 4.0 at 40°C for 1, 6, or 12 hours. The reactions were stopped by incubation at 99°C for 5 min. Each resultant sample was analyzed by a HPAEC-PAD method.
